# Supplementary material
Source: HighWire-hosted journal article supplement (http://www.cmaj.ca/highwire/filestream/69164/field_highwire_adjunct_files/0/171411-image-1-at.pdf)
Supplement: 171411-image-1-at.pdf [file 171411-image-1-at.pdf]

## Appendix 1

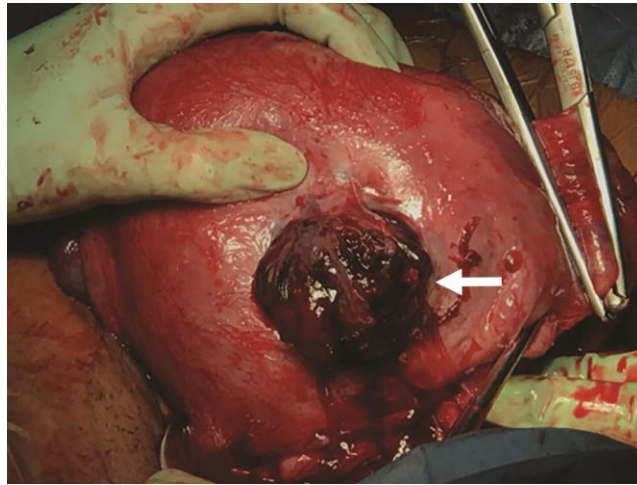

Uterus of a 37-year-old woman with the placenta invading through the anterior wall at the site of the previous classical cesarean delivery (arrow). The fetus had already been delivered through a standard lower segment incision, which was closed for hemostasis before the hysterectomy.
